# Supplementary material for: Unusual, broad red emission of novel Ce3+-activated Sr3Sc4O9 phosphors under visible-light excitation
Source: Royal Society of Chemistry journal article supplement (doi:10.1039/c7tc03203j), 2017-01-01
Supplement: c7tc03203j1.pdf [file c7tc03203j1.pdf]

Electronic Supplementary Information (ESI) for:

**Unusual broad red emission of novel Ce<sup>3+</sup>-activated Sr<sub>3</sub>Sc<sub>4</sub>O<sub>9</sub> phosphors under visible-light excitation**

Takuya Hasegawa,<sup>a,b,\*</sup>, Sun Woog Kim,<sup>c,\*</sup> Tadaharu Ueda,<sup>b</sup> Tadashi Ishigaki,<sup>a</sup> Kazuyoshi Uematsu,<sup>a</sup> Hiromitsu Takaba,<sup>d</sup> Kenji Toda,<sup>a,\*</sup> and Mineo Sato<sup>e</sup>

<sup>a</sup> Graduate School of Science and Technology, Niigata University, 8050 Ikarashi 2-nocho, Niigata, 950-2181, Japan.

<sup>b</sup> Department of Marine Resources, Faculty of Agriculture and Marine Science, Kochi University, 200 monobe otsu, Nankoku, Kochi, 783-8502, Japan

<sup>c</sup> Electronic Convergence Materials Division, Optic and Display Materials Center, Korea Institute of Ceramic Engineering and Technology, 101 soho-ro, Jinju-si, Gyeongsangnam-do 52851, Republic of Korea

<sup>d</sup> Department of Environmental and Energy Chemistry, Faculty of Engineering, Kogakuin University, 2665-1 Nakano, Hachioji, Tokyo 192-0015, Japan

<sup>e</sup> Department of Chemistry and Chemical Engineering, Niigata University, 8050 Ikarashi 2-nocho, Niigata 950-2181, Japan.

\*Corresponding authors:

T. Hasegawa; [hase@kochi-u.ac.jp](mailto:hase@kochi-u.ac.jp)

S.W. Kim; [skim80@kicet.re.kr](mailto:skim80@kicet.re.kr)

K. Toda; [ktoda@eng.niigata-u.ac.jp](mailto:ktoda@eng.niigata-u.ac.jp)

**Content:**

1. Coordination environmental and Bond distances of ScnO<sub>6</sub> ( $n = 1\sim 4$ ) polyhedra in the Sr<sub>3</sub>Sc<sub>4</sub>O<sub>9</sub>; Figure S1
2. Coordination environmental and Bond distances of SrnO<sub>x</sub> ( $n = 1\sim 3$ ,  $x = 6, 9$  and  $12$ ) polyhedra in the Sr<sub>3</sub>Sc<sub>4</sub>O<sub>9</sub>; Figure S2
3. Excitation (dotted line) and emission (solid line) spectra of the Sr<sub>3</sub>(Sc<sub>0.997</sub>Ce<sub>0.003</sub>)<sub>4</sub>O<sub>9</sub> (red) and Ba<sub>3</sub>(Sc<sub>0.997</sub>Ce<sub>0.003</sub>)<sub>4</sub>O<sub>9</sub> (black) phosphors. The excitation and emission spectra were recorded at maximum peak wavelength for each sample; Figure S3
4. Photoluminescence excitation (dotted line) and emission spectra (solid line) of Sr<sub>3</sub>(Sc<sub>1-x</sub>Ce<sub>x</sub>)<sub>4</sub>O<sub>9</sub> phosphors various Ce<sup>3+</sup> concentrations ( $0.0005 \leq x \leq 0.007$ ). The excitation and emission spectra were recorded at maximum peak wavelength for each sample; Figure S4

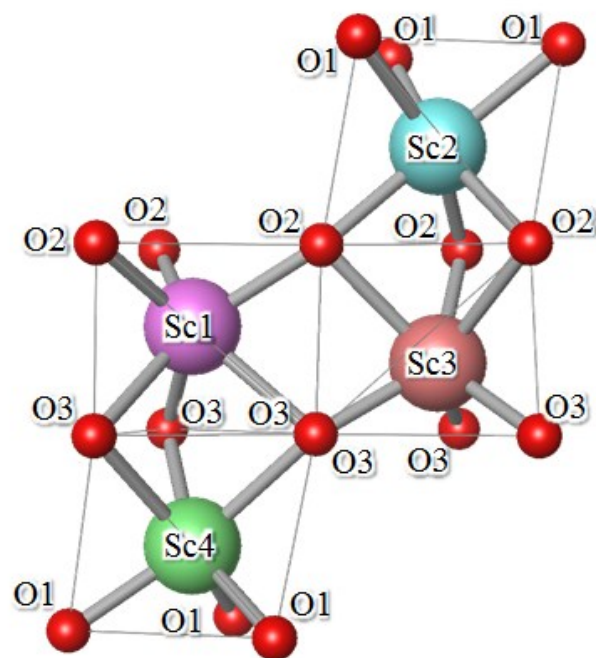

| Sc atoms | O atoms | Bond distances (nm)    |
|----------|---------|------------------------|
| Sc1      | O2      | $0.206894(2) \times 3$ |
|          | O3      | $0.222915(2) \times 3$ |
| Sc2      | O1      | $0.214523(2) \times 3$ |
|          | O2      | $0.209473(2) \times 3$ |
| Sc3      | O2      | $0.225313(2) \times 3$ |
|          | O3      | $0.195149(2) \times 3$ |
| Sc4      | O1      | $0.199950(2) \times 3$ |
|          | O3      | $0.228608(2) \times 3$ |

Figure S1 Coordination environmental and Bond distances of  $\text{Sc}_n\text{O}_6$  ( $n = 1\sim 4$ ) polyhedra in the  $\text{Sr}_3\text{Sc}_4\text{O}_9$ .

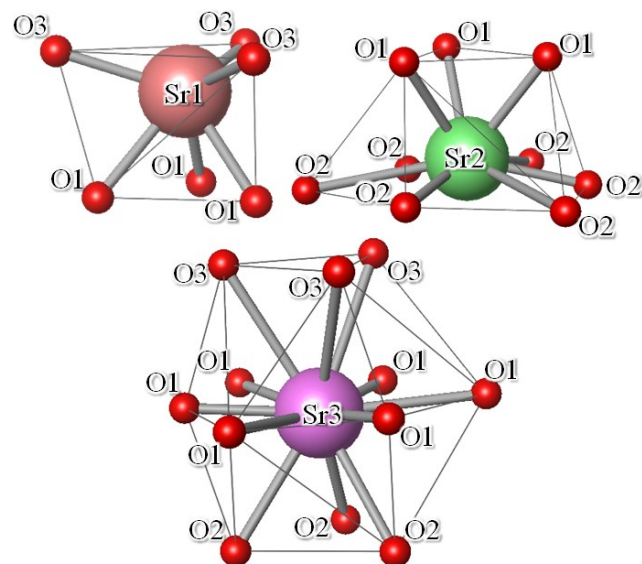

| Sr atoms | O atoms | Bond distances (nm)    |
|----------|---------|------------------------|
| Sr1      | O1      | $0.252114(2) \times 3$ |
|          | O3      | $0.246737(3) \times 3$ |
| Sr2      | O1      | $0.268115(2) \times 3$ |
|          | O2      | $0.250909(3) \times 3$ |
|          | O2      | $0.329507(4) \times 3$ |
| Sr3      | O1      | $0.253189(3) \times 3$ |
|          | O1      | $0.317049(4) \times 3$ |
|          | O2      | $0.302539(3) \times 3$ |
|          | O3      | $0.330995(3) \times 3$ |

Figure S2 Coordination environmental and Bond distances of  $\text{Sr}_n\text{O}_x$  ( $n = 1\sim 3$ ,  $x = 6, 9$  and  $12$ ) polyhedra in the  $\text{Sr}_3\text{Sc}_4\text{O}_9$ .

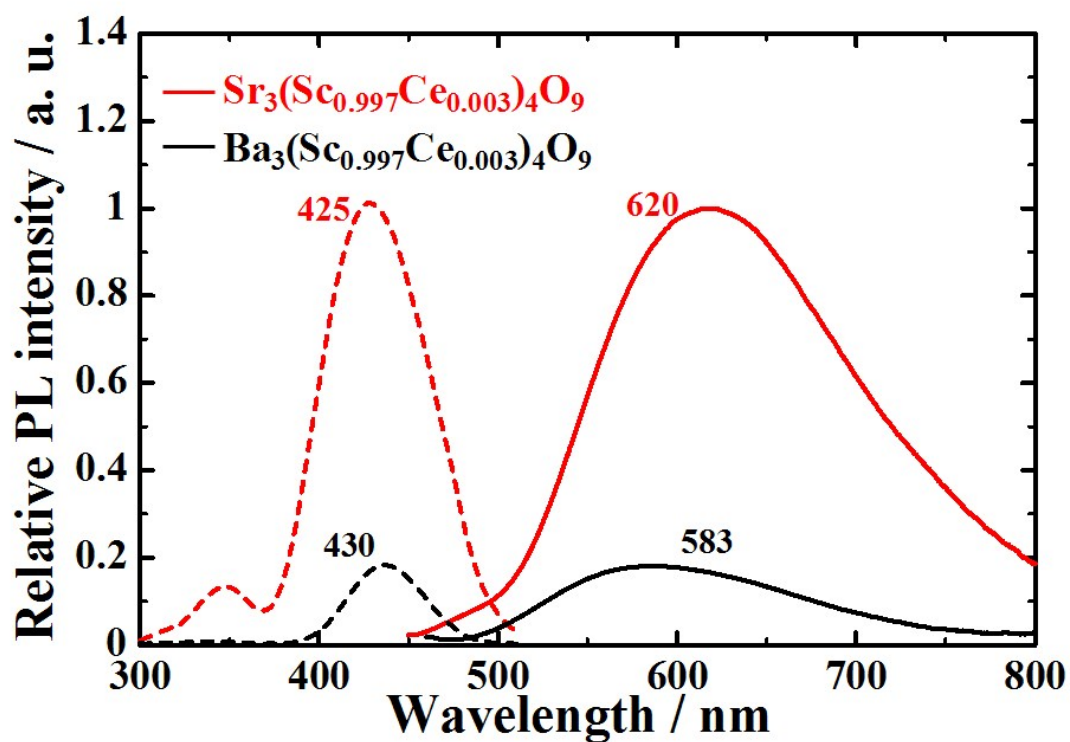

Figure S3 Excitation (dotted line) and emission (solid line) spectra of the  $\text{Sr}_3(\text{Sc}_{0.997}\text{Ce}_{0.003})_4\text{O}_9$  (red) and  $\text{Ba}_3(\text{Sc}_{0.997}\text{Ce}_{0.003})_4\text{O}_9$  (black) phosphors. The excitation and emission spectra were recorded at maximum peak wavelength for each sample.

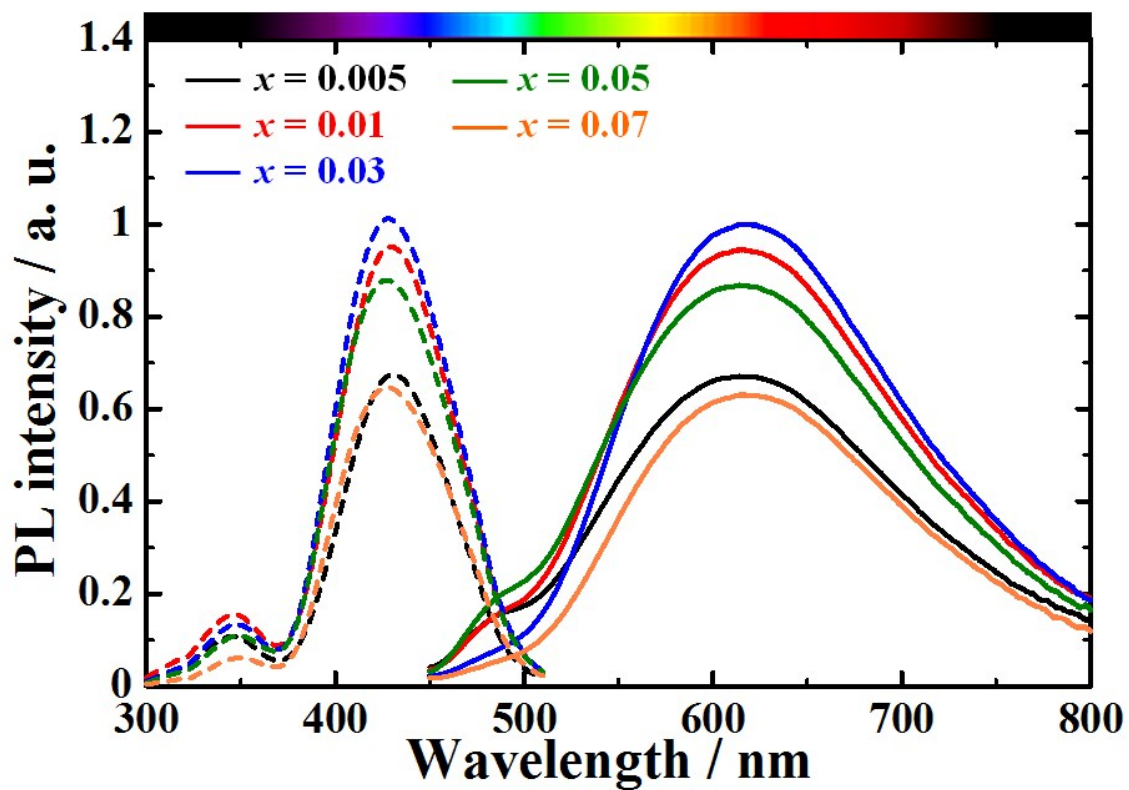

Figure S4 Photoluminescence excitation (dotted line) and emission spectra (solid line) of  $\text{Sr}_3(\text{Sc}_{1-x}\text{Ce}_x)_4\text{O}_9$  phosphors various  $\text{Ce}^{3+}$  concentrations ( $0.0005 \leq x \leq 0.007$ ). The excitation and emission spectra were recorded at maximum peak wavelength for each sample.
